# Supplementary material for: How genetic data improve the interpretation of results of faecal glucocorticoid metabolite measurements in a free-living population
Source: PubMed Central journal article supplement (PMC5568376; doi:10.1371/journal.pone.0183718), 2017-08-23
Supplement: pone.0183718.s002.pdf [file pone.0183718.s002.pdf]

| sample_ID | individual | sex    | GCM        | season | year |
|-----------|------------|--------|------------|--------|------|
| 1         | F1         | female | 102.399    | spring | 2014 |
| 2         | F2         | female | 197.274    | spring | 2014 |
| 3         | M1         | male   | 47.8665    | spring | 2014 |
| 4         | F3         | female | 370.029    | spring | 2014 |
| 5         | M2         | male   | 180.675    | spring | 2014 |
| 6         | M3         | male   | 75.66075   | spring | 2014 |
| 7         | F4         | female | 89.7545    | spring | 2014 |
| 8         | F5         | female | 76.5655    | spring | 2014 |
| 9         | F3         | female | 110.22825  | spring | 2014 |
| 10        | M4         | male   | 60.885     | spring | 2014 |
| 11        | M5         | male   | 94.1655    | spring | 2014 |
| 12        | F6         | female | 3.828      | spring | 2014 |
| 13        | M6         | male   | 80.4705    | spring | 2014 |
| 14        | M7         | male   | 45.44925   | spring | 2014 |
| 15        | F7         | female | 137.251125 | spring | 2014 |
| 16        | F7         | female | 158.565    | spring | 2014 |
| 17        | M8         | male   | 116.11875  | spring | 2014 |
| 18        | M1         | male   | 91.3605    | spring | 2014 |
| 19        | F8         | female | 114.976125 | spring | 2014 |
| 20        | F9         | female | 100.859    | spring | 2014 |
| 21        | F2         | female | 70.983     | spring | 2014 |
| 22        | M9         | male   | 102.2835   | spring | 2014 |
| 23        | M7         | male   | 27.104     | spring | 2014 |
| 24        | F10        | female | 100.8315   | spring | 2014 |
| 25        | M7         | male   | 70.33125   | spring | 2014 |
| 26        | M5         | male   | 73.821     | spring | 2014 |
| 27        | M4         | male   | 36.9765    | spring | 2014 |
| 28        | M10        | male   | 39.699     | spring | 2014 |
| 29        | F2         | female | 221.43     | spring | 2014 |
| 30        | M5         | male   | 58.234     | spring | 2014 |
| 31        | M7         | male   | 52.338     | spring | 2014 |
| 32        | M5         | male   | 63.7791    | spring | 2014 |
| 33        | F11        | female | 106.326    | spring | 2014 |
| 34        | F2         | female | 107.514    | spring | 2014 |
| 35        | F6         | female | 70.71075   | spring | 2014 |
| 36        | F12        | female | 65.439     | spring | 2014 |
| 37        | M11        | male   | 112.0185   | autumn | 2014 |
| 38        | M12        | male   | 63.228     | autumn | 2014 |
| 39        | F13        | female | 20.856     | autumn | 2014 |
| 40        | F10        | female | 31.086     | autumn | 2014 |
| 41        | M1         | male   | 61.1655    | autumn | 2014 |
| 42        | F14        | female | 54.6645    | autumn | 2014 |
| 43        | F14        | female | 89.6775    | autumn | 2014 |
| 44        | F3         | female | 94.512     | autumn | 2014 |
| 45        | M10        | male   | 24.321     | spring | 2015 |
| 46        | M13        | male   | 89.1825    | spring | 2015 |
| 47        | M14        | male   | 69.9765    | spring | 2015 |
| 48        | F6         | female | 43.0815    | spring | 2015 |
| 49        | M15        | male   | 156.3375   | spring | 2015 |

|    |     |        |           |        |      |
|----|-----|--------|-----------|--------|------|
| 50 | F2  | female | 272.382   | spring | 2015 |
| 51 | F2  | female | 342.408   | spring | 2015 |
| 52 | M16 | male   | 100.815   | spring | 2015 |
| 53 | F2  | female | 225.3471  | spring | 2015 |
| 54 | M15 | male   | 188.6775  | spring | 2015 |
| 55 | M15 | male   | 119.05575 | spring | 2015 |
| 56 | M8  | male   | 186.0375  | spring | 2015 |
| 57 | M8  | male   | 132.891   | spring | 2015 |
| 58 | M15 | male   | 115.8465  | spring | 2015 |
| 59 | M15 | male   | 137.742   | spring | 2015 |
| 60 | M4  | male   | 16.5      | spring | 2015 |
| 61 | M2  | male   | 97.6635   | spring | 2015 |
| 62 | F2  | female | 86.2125   | spring | 2015 |
| 63 | M10 | male   | 188.991   | spring | 2015 |
| 64 | M1  | male   | 102.5475  | spring | 2015 |
| 65 | M8  | male   | 103.24875 | spring | 2015 |
| 66 | M15 | male   | 75.273    | spring | 2015 |
| 67 | M8  | male   | 97.5645   | spring | 2015 |
| 68 | M15 | male   | 92.6145   | spring | 2015 |
| 69 | F15 | female | 76.395    | spring | 2015 |
| 70 | F15 | female | 47.7675   | spring | 2015 |
| 71 | F6  | female | 68.244    | spring | 2015 |
| 72 | F16 | female | 134.739   | spring | 2015 |
| 73 | F16 | female | 50.08575  | spring | 2015 |
| 74 | M17 | male   | 26.664    | spring | 2015 |
| 75 | F2  | female | 81.807    | spring | 2015 |
| 76 | F2  | female | 116.6055  | spring | 2015 |
| 77 | F2  | female | 134.1285  | spring | 2015 |
| 78 | M13 | male   | 113.0745  | spring | 2015 |
| 79 | M14 | male   | 35.6895   | spring | 2015 |
| 80 | F14 | female | 96.822    | autumn | 2015 |
| 81 | M4  | male   | 76.494    | spring | 2015 |
| 82 | M18 | male   | 76.8405   | autumn | 2015 |
| 83 | F2  | female | 67.6995   | autumn | 2015 |
| 84 | F3  | female | 63.0135   | autumn | 2015 |
| 85 | F7  | female | 43.23     | autumn | 2015 |
| 86 | F7  | female | 42.9825   | autumn | 2015 |
| 87 | F17 | female | 68.0955   | autumn | 2015 |
| 88 | F2  | female | 79.068    | autumn | 2015 |
| 89 | M19 | male   | 49.7805   | autumn | 2015 |
| 90 | M20 | male   | 80.916    | autumn | 2015 |
| 91 | M20 | male   | 86.1135   | autumn | 2015 |
| 92 | F6  | female | 86.8065   | autumn | 2015 |
| 93 | F11 | female | 35.013    | autumn | 2015 |
| 94 | F3  | female | 60.49725  | autumn | 2015 |
| 95 | F17 | female | 122.628   | autumn | 2015 |
| 96 | M21 | male   | 75.7515   | autumn | 2015 |
| 97 | M21 | male   | 99.3465   | autumn | 2015 |
| 98 | M21 | male   | 166.98    | autumn | 2015 |
| 99 | M21 | male   | 128.5515  | autumn | 2015 |

|     |     |        |          |        |      |
|-----|-----|--------|----------|--------|------|
| 100 | M21 | male   | 95.7165  | autumn | 2015 |
| 101 | M8  | male   | 55.5225  | autumn | 2015 |
| 102 | M8  | male   | 73.35075 | autumn | 2015 |
| 103 | M1  | male   | 55.539   | autumn | 2015 |
| 104 | M1  | male   | 99.825   | autumn | 2015 |
| 105 | M14 | male   | 32.6535  | autumn | 2015 |
| 106 | M18 | male   | 39.49275 | autumn | 2015 |
| 107 | M18 | male   | 36.465   | autumn | 2015 |
| 108 | M1  | male   | 26.565   | autumn | 2015 |
| 109 | F3  | female | 46.992   | autumn | 2015 |
| 110 | F3  | female | 77.121   | autumn | 2015 |
| 111 | F6  | female | 59.70525 | autumn | 2015 |
| 112 | M13 | male   | 68.28525 | autumn | 2015 |
| 113 | M4  | male   | 70.587   | autumn | 2015 |
