# Supplementary material for: How genetic data improve the interpretation of results of faecal glucocorticoid metabolite measurements in a free-living population
Source: PLoS One. 2017 Aug 23;12(8):e0183718. doi: 10.1371/journal.pone.0183718 (PMC5568376; doi:10.1371/journal.pone.0183718)
Supplement: S1 Table — (PDF) [file pone.0183718.s001.pdf]

| individual | sex    | GCM      | season | year |
|------------|--------|----------|--------|------|
| F1         | female | 102.399  | spring | 2014 |
| F2         | female | 197.274  | spring | 2014 |
| M1         | male   | 47.8665  | spring | 2014 |
| F3         | female | 267.2835 | spring | 2014 |
| F3         | female | 472.7745 | spring | 2014 |
| M2         | male   | 180.675  | spring | 2014 |
| M3         | male   | 84.48    | spring | 2014 |
| M3         | male   | 66.8415  | spring | 2014 |
| F4         | female | 96.9705  | spring | 2014 |
| F4         | female | 119.625  | spring | 2014 |
| F4         | female | 52.668   | spring | 2014 |
| F5         | female | 72.996   | spring | 2014 |
| F5         | female | 66.2805  | spring | 2014 |
| F5         | female | 90.42    | spring | 2014 |
| F3         | female | 92.0535  | spring | 2014 |
| F3         | female | 128.403  | spring | 2014 |
| M4         | male   | 60.885   | spring | 2014 |
| M5         | male   | 99.165   | spring | 2014 |
| M5         | male   | 91.6245  | spring | 2014 |
| M5         | male   | 86.3445  | spring | 2014 |
| M5         | male   | 79.6125  | spring | 2014 |
| M5         | male   | 114.081  | spring | 2014 |
| F6         | female | 3.828    | spring | 2014 |
| M6         | male   | 78.507   | spring | 2014 |
| M6         | male   | 62.0895  | spring | 2014 |
| M6         | male   | 100.815  | spring | 2014 |
| M7         | male   | 49.731   | spring | 2014 |
| M7         | male   | 41.1675  | spring | 2014 |
| F7         | female | 113.8995 | spring | 2014 |
| F7         | female | 174.9165 | spring | 2014 |
| F7         | female | 137.709  | spring | 2014 |
| F7         | female | 122.4795 | spring | 2014 |
| F7         | female | 158.565  | spring | 2014 |
| M8         | male   | 139.5735 | spring | 2014 |
| M8         | male   | 92.664   | spring | 2014 |
| M1         | male   | 91.3605  | spring | 2014 |
| F8         | female | 89.1495  | spring | 2014 |
| F8         | female | 115.797  | spring | 2014 |
| F8         | female | 71.973   | spring | 2014 |
| F8         | female | 182.985  | spring | 2014 |
| F9         | female | 68.904   | spring | 2014 |
| F9         | female | 101.31   | spring | 2014 |
| F9         | female | 132.363  | spring | 2014 |
| F2         | female | 48.0645  | spring | 2014 |
| F2         | female | 93.9015  | spring | 2014 |
| M9         | male   | 170.016  | spring | 2014 |
| M9         | male   | 34.551   | spring | 2014 |
| M7         | male   | 20.5425  | spring | 2014 |
| M7         | male   | 29.5845  | spring | 2014 |

|     |        |          |        |      |
|-----|--------|----------|--------|------|
| M7  | male   | 31.185   | spring | 2014 |
| F10 | female | 181.1205 | spring | 2014 |
| F10 | female | 20.5425  | spring | 2014 |
| M7  | male   | 61.248   | spring | 2014 |
| M7  | male   | 79.4145  | spring | 2014 |
| M5  | male   | 73.821   | spring | 2014 |
| M4  | male   | 36.9765  | spring | 2014 |
| M10 | male   | 39.699   | spring | 2014 |
| F2  | female | 221.43   | spring | 2014 |
| M5  | male   | 56.892   | spring | 2014 |
| M5  | male   | 56.166   | spring | 2014 |
| M5  | male   | 61.644   | spring | 2014 |
| M7  | male   | 70.7685  | spring | 2014 |
| M7  | male   | 33.9075  | spring | 2014 |
| M5  | male   | 51.0345  | spring | 2014 |
| M5  | male   | 51.744   | spring | 2014 |
| M5  | male   | 99.033   | spring | 2014 |
| M5  | male   | 64.449   | spring | 2014 |
| M5  | male   | 52.635   | spring | 2014 |
| F11 | female | 39.0225  | spring | 2014 |
| F11 | female | 173.6295 | spring | 2014 |
| F2  | female | 119.9055 | spring | 2014 |
| F2  | female | 95.1225  | spring | 2014 |
| F6  | female | 73.227   | spring | 2014 |
| F6  | female | 68.1945  | spring | 2014 |
| F12 | female | 65.439   | spring | 2014 |
| M11 | male   | 112.0185 | autumn | 2014 |
| M12 | male   | 63.228   | autumn | 2014 |
| M12 | male   | 63.228   | autumn | 2014 |
| F13 | female | 20.856   | autumn | 2014 |
| F10 | female | 31.086   | autumn | 2014 |
| M1  | male   | 61.1655  | autumn | 2014 |
| F14 | female | 54.6645  | autumn | 2014 |
| F14 | female | 89.6775  | autumn | 2014 |
| F3  | female | 94.512   | autumn | 2014 |
| M10 | male   | 24.321   | spring | 2015 |
| M13 | male   | 89.1825  | spring | 2015 |
| M14 | male   | 69.9765  | spring | 2015 |
| F6  | female | 43.4445  | spring | 2015 |
| F6  | female | 42.7185  | spring | 2015 |
| M15 | male   | 171.7485 | spring | 2015 |
| M15 | male   | 140.9265 | spring | 2015 |
| F2  | female | 272.382  | spring | 2015 |
| F2  | female | 342.408  | spring | 2015 |
| M16 | male   | 100.815  | spring | 2015 |
| F2  | female | 221.661  | spring | 2015 |
| F2  | female | 185.4435 | spring | 2015 |
| F2  | female | 226.314  | spring | 2015 |
| F2  | female | 235.092  | spring | 2015 |
| F2  | female | 258.225  | spring | 2015 |

|     |        |          |        |      |
|-----|--------|----------|--------|------|
| M15 | male   | 188.6775 | spring | 2015 |
| M15 | male   | 113.751  | spring | 2015 |
| M15 | male   | 124.3605 | spring | 2015 |
| M8  | male   | 186.0375 | spring | 2015 |
| M8  | male   | 132.891  | spring | 2015 |
| M15 | male   | 115.8465 | spring | 2015 |
| M15 | male   | 128.8155 | spring | 2015 |
| M15 | male   | 148.335  | spring | 2015 |
| M15 | male   | 136.0755 | spring | 2015 |
| M4  | male   | 16.5     | spring | 2015 |
| M2  | male   | 97.6635  | spring | 2015 |
| F2  | female | 86.2125  | spring | 2015 |
| M10 | male   | 188.991  | spring | 2015 |
| M1  | male   | 102.5475 | spring | 2015 |
| M8  | male   | 99.165   | spring | 2015 |
| M8  | male   | 107.3325 | spring | 2015 |
| M15 | male   | 75.273   | spring | 2015 |
| M8  | male   | 117.909  | spring | 2015 |
| M8  | male   | 77.22    | spring | 2015 |
| M15 | male   | 92.6145  | spring | 2015 |
| F15 | female | 76.395   | spring | 2015 |
| F15 | female | 47.7675  | spring | 2015 |
| F6  | female | 68.244   | spring | 2015 |
| F16 | female | 134.739  | spring | 2015 |
| F16 | female | 42.966   | spring | 2015 |
| F6  | female | 31.746   | spring | 2015 |
| F6  | female | 35.706   | spring | 2015 |
| F6  | female | 89.925   | spring | 2015 |
| M17 | male   | 26.664   | spring | 2015 |
| F2  | female | 81.807   | spring | 2015 |
| F2  | female | 116.6055 | spring | 2015 |
| F2  | female | 134.1285 | spring | 2015 |
| M13 | male   | 113.0745 | spring | 2015 |
| M14 | male   | 35.6895  | spring | 2015 |
| F14 | female | 170.016  | autumn | 2015 |
| F14 | female | 23.628   | autumn | 2015 |
| M4  | male   | 76.494   | spring | 2015 |
| M18 | male   | 72.798   | autumn | 2015 |
| M18 | male   | 80.883   | autumn | 2015 |
| F2  | female | 67.6995  | autumn | 2015 |
| F3  | female | 63.0135  | autumn | 2015 |
| F7  | female | 43.23    | autumn | 2015 |
| F7  | female | 42.9825  | autumn | 2015 |
| F17 | female | 68.0955  | autumn | 2015 |
| F2  | female | 79.068   | autumn | 2015 |
| M19 | male   | 49.7805  | autumn | 2015 |
| M20 | male   | 80.916   | autumn | 2015 |
| M20 | male   | 86.1135  | autumn | 2015 |
| F6  | female | 86.8065  | autumn | 2015 |
| F11 | female | 35.013   | autumn | 2015 |

|     |        |          |        |      |
|-----|--------|----------|--------|------|
| F3  | female | 67.3365  | autumn | 2015 |
| F3  | female | 53.658   | autumn | 2015 |
| F17 | female | 122.628  | autumn | 2015 |
| M21 | male   | 75.7515  | autumn | 2015 |
| M21 | male   | 99.3465  | autumn | 2015 |
| M21 | male   | 166.98   | autumn | 2015 |
| M21 | male   | 128.5515 | autumn | 2015 |
| M21 | male   | 95.7165  | autumn | 2015 |
| M8  | male   | 55.5225  | autumn | 2015 |
| M8  | male   | 63.261   | autumn | 2015 |
| M8  | male   | 83.4405  | autumn | 2015 |
| M1  | male   | 55.539   | autumn | 2015 |
| M1  | male   | 99.825   | autumn | 2015 |
| M14 | male   | 32.6535  | autumn | 2015 |
| M18 | male   | 46.332   | autumn | 2015 |
| M18 | male   | 18.6285  | autumn | 2015 |
| M18 | male   | 36.465   | autumn | 2015 |
| M1  | male   | 26.565   | autumn | 2015 |
| F3  | female | 48.279   | autumn | 2015 |
| F3  | female | 45.705   | autumn | 2015 |
| F3  | female | 77.121   | autumn | 2015 |
| F6  | female | 22.308   | autumn | 2015 |
| F6  | female | 97.1025  | autumn | 2015 |
| M13 | male   | 39.468   | autumn | 2015 |
| M13 | male   | 97.1025  | autumn | 2015 |
| M4  | male   | 26.499   | autumn | 2015 |
| M4  | male   | 114.675  | autumn | 2015 |
